# Supplementary material for: Magnetic Susceptibility and Statistical Modeling for the Assessment of Toxic Heavy Metals in Surface Sediments of Ennore Port, East Coast of Tamil Nadu, India
Source: Research Square preprint supplement (doi:10.21203/rs.3.rs-8257448/v1), 2026-02-24
Supplement: Supplementary file 1 [file 64c4b7a8791b43759153397f.docx]

**Declaration of competing interest**

The authors confirm that they have no financial conflicts of interest or personal relationships that could have influenced the findings presented in this paper.
