# Supplementary material for: Magnetic Susceptibility and Statistical Modeling for the Assessment of Toxic Heavy Metals in Surface Sediments of Ennore Port, East Coast of Tamil Nadu, India
Source: Research Square preprint supplement (doi:10.21203/rs.3.rs-8257448/v1), 2026-02-24
Supplement: Supplementary file 2 [file a3b6e262a68cdcde142a15ec.docx]

**Highlights**

- This study simultaneously quantified 19 heavy metals (Mg–Pb) and magnetic parameters (χLF, χHF, χFD%) across 26 sediment samples collected from the sea, beach, and creek environments of Ennore Port on the East Coast of Tamil Nadu.
- High levels of Fe, Ti, V, Cr, Mn, Ni, Zn, and Pb were observed in hotspot sites (S2, S9, B4, B7, C4, C9), closely associated with industrial discharges, port activities, dredging, shipping operations, and urban wastewater inflows.
- χLF and χHF values indicated the dominance of ferrimagnetic minerals in most sediments, with ~80% of samples showing moderate magnetic susceptibility, revealing the influence of industrial particulates and combustion-derived magnetic grains.
- χFD% values revealed the coexistence of SP, SD, and MD magnetic grains, demonstrating complex sedimentary processes influenced by natural geological inputs and human-induced magnetic particle deposition.
- Although correlations between magnetic susceptibility and heavy metals were significant, r² values did not exceed 0.50, confirming that magnetic enhancement is substantial only in locations highly affected by anthropogenic metal inputs
- Three principal components explained 58.57% of total variance; PC1 strongly represented industrially derived metals (Ti–Pb), PC2 captured natural geochemical signals (Si, As), and PC3 highlighted magnetically responsive SP/SD minerals.
- Hierarchical clustering divided variables into two major groups: Cluster I containing magnetic properties with Fe, Ti, V, Cr, Mn, Ni, Zn, and Pb, confirming their common sources, while Cluster II isolated Si, representing natural lithogenic input.
- Results prove that χLF, χHF, and χFD% are rapid, cost-effective, and non-destructive indicators capable of screening heavy-metal-enriched sediments, supporting their application in coastal environmental monitoring programs
