# Supplementary material for: Magnetic Susceptibility and Statistical Modeling for the Assessment of Toxic Heavy Metals in Surface Sediments of Ennore Port, East Coast of Tamil Nadu, India
Source: Research Square preprint supplement (doi:10.21203/rs.3.rs-8257448/v1), 2026-02-24
Supplement: Supplementary file 3 [file b131d276bd531902f8680773.docx]

**CRediT authorship contribution statement**

**D. Rajendiran:** Writing – original draft, Visualization, Validation, Methodology, Investigation, Formal analysis, Conceptualization, **N. Harikrishnan:** Writing – review & editing, Resources, Methodology, Conceptualization, **N. R. Sheela:** Resources, Methodology, Conceptualization, **K. Veeramuthu:** Writing – review & editing, Validation, Supervision, Resources, Methodology, Conceptualization, Project administration.
